# Supplementary material
Source: publisher figshare collection journal article supplement (https://gsajournals.figshare.com/ndownloader/files/13539125)
Supplement: Supplementary file 1 [file 13539125]

1	BICF2P1383091	0	212740
1	BICF2G630707905	0	251205
1	chr1_266523	0	266523
1	BICF2G630707908	0	273487
1	chr1_363618	0	363618
1	chr1_363892	0	363892
1	chr1_412573	0	412573
1	BICF2G630707932	0	420036
1	BICF2P98519	0	486173
1	BICF2P1377001	0	497316
1	BICF2G630707957	0	511277
1	BICF2G630707961	0	535538
1	BICF2P1282632	0	573533
1	chr1_601944	0	601944
1	BICF2G630707977	0	602567
1	TIGRP2P340_rs9005494	0	614572
1	BICF2G630707991	0	650365
1	BICF2G630708023	0	700273
1	BICF2G630708028	0	717913
1	BICF2P188815	0	753378
1	BICF2P1124921	0	822555
1	BICF2G630708037	0	832722
1	BICF2G630708039	0	860805
1	BICF2P1357045	0	867177
1	BICF2P646761	0	889117
1	BICF2G630708043	0	895636
1	BICF2G630708049	0	944452
1	BICF2P303607	0	968152
1	BICF2P195485	0	1001017
1	BICF2P987431	0	1012024
1	BICF2P606694	0	1027507
1	BICF2P606693	0	1027604
1	BICF2P742102	0	1030993
1	BICF2P1277518	0	1048637
1	BICF2G630708061	0	1062891
1	BICF2P1065496	0	1074156
1	BICF2G630708083	0	1101117
1	BICF2P112561	0	1113115
1	chr1_1120968	0	1120968
1	BICF2P760763	0	1132340
1	BICF2P392899	0	1136684
1	BICF2G630708105	0	1136916
1	BICF2G630708106	0	1148209
1	BICF2G630708111	0	1178399
1	BICF2G630708113	0	1214774
1	chr1_1229847	0	1229847
1	chr1_1251817	0	1251817
1	chr1_1266515	0	1266515
1	chr1_1303598	0	1303598
1	BICF2G630708124	0	1312356
1	BICF2G630708125	0	1317124
1	BICF2G630708127	0	1326088
1	BICF2G630708129	0	1361419
1	BICF2G630708148	0	1400426
1	BICF2G630708152	0	1404132
1	chr1_1412112	0	1412112
1	chr1_1413579	0	1413579
1	BICF2G630708156	0	1413914
1	chr1_1414657	0	1414657
1	chr1_1414797	0	1414797
1	chr1_1421066	0	1421066
1	BICF2G630708166	0	1460648
1	BICF2P1442152	0	1472808
1	BICF2G630708173	0	1499313
1	BICF2S23217029	0	1518294
1	BICF2G630708179	0	1531511
1	BICF2G630708182	0	1544590
1	BICF2G630708185	0	1562482
1	BICF2G630708186	0	1578245
1	chr1_1583329	0	1583329
1	BICF2P1154406	0	1594588
1	BICF2P247436	0	1601615
1	BICF2P562192	0	1608626
1	BICF2G630708190	0	1622718
1	BICF2G630708194	0	1633259
1	BICF2G630708195	0	1643262
1	BICF2P790583	0	1659569
1	BICF2G630708204	0	1676322
1	BICF2G630708205	0	1678686
1	BICF2G630708209	0	1700583
1	BICF2G630708211	0	1722438
1	BICF2P207208	0	1728485
1	BICF2G630708216	0	1752349
1	BICF2P741303	0	1759968
1	BICF2P726575	0	1779875
1	BICF2P929768	0	1785323
1	BICF2P406037	0	1786997
1	BICF2P804826	0	1810947
1	BICF2P988306	0	1819020
1	BICF2P180743	0	1838805
1	BICF2G630708220	0	1869397
1	BICF2P1413903	0	1873919
1	BICF2P814595	0	1896142
1	BICF2G630708225	0	1916583
1	BICF2G630708226	0	1927088
1	BICF2G630708230	0	1985344
1	TIGRP2P396_rs9152464	0	2008905
1	BICF2P1092470	0	2021998
1	BICF2P168065	0	2048128
1	BICF2P831807	0	2067225
1	BICF2P1148238	0	2078104
1	BICF2S23551233	0	2080109
1	TIGRP2P401_rs8846599	0	2092214
1	BICF2G630708238	0	2102141
1	BICF2G630708242	0	2164283
1	TIGRP2P2613_rs9126421	0	2175231
1	BICF2P1167646	0	2191437
1	BICF2P515422	0	2195827
1	BICF2S2364686	0	2208277
1	TIGRP2P2627_rs8593091	0	2277640
1	BICF2G630708249	0	2289441
1	BICF2P1336950	0	2301633
1	BICF2S22956053	0	2383448
1	BICF2G630708254	0	2391860
1	BICF2G630708265	0	2407180
1	BICF2G630708271	0	2414014
1	BICF2G630708286	0	2426690
1	BICF2G630708296	0	2438873
1	BICF2G630708300	0	2458761
1	BICF2S2335694	0	2484855
1	BICF2P551656	0	2501183
1	BICF2P1451246	0	2507972
1	TIGRP2P2671_rs8596160	0	2550379
1	BICF2G630708306	0	2557296
1	BICF2G630708309	0	2609390
1	BICF2G630708310	0	2615407
1	BICF2G630708312	0	2625749
1	BICF2G630708318	0	2673228
1	BICF2G630708319	0	2692523
1	chr1_2787452	0	2787452
1	chr1_2794145	0	2794145
1	BICF2P870035	0	2815013
1	BICF2G630708330	0	2897852
1	BICF2P1085054	0	2948208
1	chr1_2952205	0	2952205
1	chr1_2993507	0	2993507
1	BICF2G630708333	0	3000133
1	BICF2G630708339	0	3041620
1	TIGRP2P2684_rs8604610	0	3127281
1	BICF2P1382039	0	3148292
1	BICF2P562904	0	3162017
1	BICF2G630708344	0	3166250
1	BICF2G630708346	0	3194397
1	BICF2P1090882	0	3200422
1	TIGRP2P2688_rs8722583	0	3243958
1	BICF2P91832	0	3274017
1	TIGRP2P2690_rs9195750	0	3308831
1	TIGRP2P2693_rs9078389	0	3326775
1	TIGRP2P2694_rs9074880	0	3374684
1	chr1_3380658	0	3380658
1	BICF2G630708353	0	3419580
1	BICF2S23512188	0	3428195
1	BICF2G630708356	0	3470332
1	BICF2P389287	0	3480810
1	BICF2S23349063	0	3484482
1	BICF2G630708358	0	3513520
1	BICF2G630708359	0	3520373
1	G5f54S91	0	3556626
1	BICF2G630708362	0	3587745
1	BICF2G630708367	0	3639893
1	BICF2S23763002	0	3667307
1	BICF2G630708371	0	3668330
1	BICF2P590289	0	3697160
1	BICF2G630708374	0	3724186
1	TIGRP2P2702_rs8768645	0	3760558
1	BICF2P232247	0	3778681
1	BICF2G630708377	0	3796640
1	BICF2P555674	0	3828021
1	TIGRP2P2710_rs9134620	0	3842554
1	BICF2P333055	0	3875185
1	BICF2G630708380	0	3890148
1	BICF2G630708384	0	3962719
1	BICF2P322145	0	3964544
1	BICF2P194479	0	3967481
1	BICF2P915835	0	3989037
1	TIGRP2P2751_rs8733852	0	4090327
1	BICF2P637675	0	4120708
1	TIGRP2P2774_rs8786396	0	4134195
1	BICF2G630708391	0	4141836
1	BICF2P1426220	0	4157111
1	BICF2P675305	0	4172445
1	BICF2P675307	0	4174806
1	BICF2G630708396	0	4204443
1	BICF2G630708397	0	4210698
1	BICF2P211382	0	4227095
1	chr1_4227658	0	4227658
1	BICF2G630708405	0	4245417
1	TIGRP2P2780_rs8499983	0	4264222
1	BICF2G630708412	0	4272138
1	BICF2G630708417	0	4283592
1	chr1_4305894	0	4305894
1	chr1_4320363	0	4320363
1	BICF2G630708422	0	4361401
1	BICF2G630708423	0	4371564
1	BICF2G630708424	0	4390106
1	BICF2P28788	0	4410755
1	chr1_4419221	0	4419221
1	chr1_4419714	0	4419714
1	BICF2P313176	0	4499421
1	BICF2G630708433	0	4560104
1	BICF2P370160	0	4575316
1	TIGRP2P2822_rs8922524	0	4600818
1	chr1_4606010	0	4606010
1	BICF2P659809	0	4671291
1	TIGRP2P2846_rs8786031	0	4726836
1	BICF2G630708438	0	4820578
1	BICF2P146323	0	4878941
1	BICF2P931405	0	4886951
1	chr1_4893453	0	4893453
1	BICF2P1275198	0	4901016
1	BICF2S2339476	0	4911941
1	BICF2P371264	0	4913657
1	BICF2P1070937	0	4914914
1	chr1_4915001	0	4915001
1	BICF2P1031026	0	4928973
1	BICF2G630708462	0	4942312
1	BICF2G630708467	0	4951927
1	TIGRP2P2903_rs9014550	0	4957252
1	BICF2P900574	0	4973985
1	chr1_4974870	0	4974870
1	TIGRP2P2911_rs8936096	0	4979308
1	chr1_4985187	0	4985187
1	BICF2G630708548	0	5006108
1	BICF2G630708568	0	5013851
1	BICF2G630708570	0	5016106
1	TIGRP2P2919_rs8606614	0	5029025
1	chr1_5029107	0	5029107
1	chr1_5030287	0	5030287
1	BICF2G630708598	0	5044074
1	BICF2S23423243	0	5059152
1	BICF2G630708623	0	5066599
1	BICF2G630708633	0	5073833
1	BICF2G630708647	0	5091966
1	BICF2P1044618	0	5122651
1	BICF2P934097	0	5128753
1	BICF2P1405933	0	5141525
1	BICF2P1244955	0	5159885
1	BICF2G630708690	0	5169418
1	BICF2P607260	0	5196785
1	BICF2P123491	0	5226059
1	TIGRP2P2962_rs8537173	0	5244422
1	TIGRP2P2964_rs9157697	0	5257306
1	TIGRP2P2975_rs9102742	0	5287987
1	TIGRP2P2985_rs9123662	0	5310127
1	TIGRP2P2986_rs9000637	0	5323473
1	TIGRP2P2987_rs9029815	0	5325340
1	BICF2P166510	0	5344916
1	BICF2S23650932	0	5355930
1	BICF2G630708702	0	5361620
1	BICF2P1191617	0	5394934
1	BICF2P1437031	0	5409586
1	TIGRP2P3063_rs9092981	0	5420526
1	BICF2P392799	0	5420699
1	BICF2P1197476	0	5432113
1	BICF2S23010713	0	5441353
1	BICF2P1000997	0	5452889
1	BICF2S23018913	0	5471709
1	BICF2S23649906	0	5477202
1	BICF2P1170347	0	5486246
1	BICF2G630708719	0	5497533
1	BICF2P1290808	0	5511825
1	TIGRP2P3107_rs9178643	0	5523125
1	BICF2P261197	0	5538856
1	TIGRP2P3119_rs8958362	0	5547867
1	BICF2G630708731	0	5561736
1	BICF2P981825	0	5568287
1	BICF2S23321919	0	5579289
1	BICF2G630708759	0	5600922
1	BICF2P1435982	0	5619955
1	BICF2P501260	0	5624782
1	BICF2G630708800	0	5641678
1	BICF2G630708810	0	5648072
1	BICF2G630708857	0	5669524
1	BICF2G630708864	0	5673842
1	BICF2G630708903	0	5693910
1	BICF2P1391960	0	5708287
1	BICF2P639682	0	5721194
1	BICF2G630708914	0	5746980
1	TIGRP2P3174_rs8880071	0	5748787
1	BICF2S2295154	0	5779816
1	BICF2S22948201	0	5837420
1	BICF2S23247539	0	5844519
1	BICF2S22924252	0	5859958
1	BICF2G630708925	0	5872563
1	BICF2G630708927	0	5904408
1	BICF2G630708932	0	5923888
1	BICF2S2455096	0	5938873
1	chr1_5940131	0	5940131
1	chr1_5945645	0	5945645
1	chr1_5970092	0	5970092
1	BICF2S22934599	0	6003372
1	BICF2S23626182	0	6020825
1	BICF2G630708939	0	6040509
1	BICF2G630708947	0	6052112
1	BICF2G630708979	0	6073118
1	BICF2G630708983	0	6083059
1	BICF2G630709003	0	6096061
1	BICF2G630709032	0	6122576
1	BICF2G630709037	0	6128352
1	BICF2S23426245	0	6139857
1	BICF2G630709054	0	6154774
1	BICF2S23328319	0	6162357
1	BICF2G630709073	0	6175472
1	BICF2G630709089	0	6188790
1	BICF2G630709098	0	6198709
1	BICF2P1178165	0	6209485
1	BICF2G630709132	0	6224919
1	BICF2G630709156	0	6249527
1	BICF2G630709159	0	6263554
1	BICF2G630709168	0	6271129
1	BICF2P1386889	0	6283052
1	BICF2G630709186	0	6297308
1	BICF2G630709207	0	6304660
1	BICF2G630709237	0	6352738
1	BICF2G630709239	0	6358902
1	BICF2G630709270	0	6379490
1	BICF2G630709271	0	6382543
1	BICF2P695321	0	6395704
1	BICF2S22920299	0	6405159
1	BICF2S23238022	0	6427277
1	BICF2G630709295	0	6447040
1	BICF2G630709312	0	6453921
1	BICF2G630709364	0	6474333
1	BICF2G630709388	0	6489993
1	BICF2G630709424	0	6512438
1	BICF2G630709429	0	6520082
1	BICF2P351258	0	6539253
1	BICF2S23051653	0	6551416
1	BICF2G630709448	0	6554263
1	BICF2P106739	0	6581162
1	BICF2G630709466	0	6594954
1	BICF2P341516	0	6627776
1	BICF2S2419359	0	6648634
1	BICF2S23644235	0	6668248
1	BICF2P664793	0	6675256
1	BICF2G630709471	0	6684616
1	BICF2P984968	0	6693398
1	BICF2S22959180	0	6710663
1	BICF2P219758	0	6721693
1	BICF2S2341214	0	6737483
1	BICF2P370100	0	6787592
1	BICF2S23111960	0	6797293
1	BICF2P249364	0	6814090
1	BICF2G630709473	0	6825957
1	chr1_6843854	0	6843854
1	BICF2G630709489	0	6844921
1	BICF2G630709492	0	6855643
1	BICF2G630709495	0	6865364
1	BICF2G630709499	0	6879261
1	BICF2G630709507	0	6892064
1	BICF2S23628196	0	6913015
1	BICF2G630709527	0	6932755
1	BICF2G630709528	0	6955258
1	BICF2G630709529	0	6963978
1	BICF2S2459826	0	6996338
1	BICF2S23138952	0	7020134
1	BICF2G630709551	0	7037523
1	BICF2G630709573	0	7050340
1	BICF2S23316675	0	7075191
1	chr1_7086401	0	7086401
1	chr1_7106674	0	7106674
1	chr1_7116145	0	7116145
1	chr1_7123701	0	7123701
1	BICF2S23321805	0	7143332
1	G8f60S185	0	7175735
1	chr1_7183494	0	7183494
1	chr1_7200965	0	7200965
1	chr1_7230151	0	7230151
1	chr1_7240254	0	7240254
1	chr1_7255361	0	7255361
1	G9f34S190	0	7258510
1	BICF2G630709606	0	7281243
1	chr1_7286537	0	7286537
1	chr1_7293039	0	7293039
1	chr1_7317241	0	7317241
1	BICF2G630709608	0	7336711
1	BICF2S24311805	0	7337586
1	chr1_7348868	0	7348868
1	chr1_7358282	0	7358282
1	BICF2G630709610	0	7363714
1	BICF2P135020	0	7393642
1	BICF2G630709612	0	7421527
1	BICF2G630709614	0	7482135
1	TIGRP2P7617_rs8786139	0	7505400
1	BICF2G630709680	0	7513442
1	BICF2G630709694	0	7520149
1	BICF2G630709740	0	7551941
1	BICF2G630709745	0	7554163
1	BICF2P1254836	0	7571195
1	BICF2P1062287	0	7591982
1	BICF2S23543570	0	7618214
1	BICF2G630709757	0	7635258
1	BICF2G630709759	0	7657707
1	BICF2G630709761	0	7698737
1	BICF2P799026	0	7707189
1	BICF2P772650	0	7720714
1	BICF2P151356	0	7729393
1	BICF2P649174	0	7740189
1	BICF2G630709769	0	7769386
1	BICF2G630709791	0	7785677
1	TIGRP2P7647_rs8616698	0	7813710
1	TIGRP2P7659_rs8795592	0	7820887
1	BICF2P657448	0	7831853
1	BICF2P970266	0	7838613
1	BICF2P1147267	0	7844779
1	TIGRP2P7695_rs9059427	0	7864196
1	BICF2P1339554	0	7865281
1	BICF2G630709805	0	7890465
1	BICF2G630709810	0	7898583
1	BICF2G630709825	0	7909532
1	BICF2G630709833	0	7915508
1	BICF2G630709842	0	7925031
1	chr1_7926268	0	7926268
1	BICF2G630709860	0	7935005
1	BICF2S22918173	0	7947534
1	BICF2P555245	0	7960539
1	BICF2G630709868	0	7969723
1	TIGRP2P7756_rs9025801	0	7979763
1	BICF2P533944	0	7979804
1	BICF2G630709873	0	8001795
1	BICF2P18236	0	8007051
1	BICF2G630709904	0	8022725
1	BICF2G630709926	0	8032855
1	BICF2G630709937	0	8044418
1	TIGRP2P7766_rs9177075	0	8048010
1	BICF2S23444329	0	8054483
1	TIGRP2P7768_rs9243118	0	8060534
1	BICF2S2337757	0	8073090
1	BICF2S23742583	0	8084756
1	BICF2G630709989	0	8095387
1	BICF2G630710011	0	8111989
1	BICF2P112313	0	8130890
1	BICF2P1068759	0	8143422
1	BICF2P617581	0	8161870
1	BICF2G630710036	0	8165086
1	BICF2G630710043	0	8206602
1	TIGRP2P7812_rs9060535	0	8229814
1	BICF2P1131131	0	8253421
1	BICF2G630710048	0	8268652
1	BICF2G630710049	0	8280193
1	chr1_8288009	0	8288009
1	BICF2P1430778	0	8291123
1	BICF2G630710050	0	8321430
1	chr1_8323480	0	8323480
1	chr1_8323998	0	8323998
1	chr1_8324267	0	8324267
1	BICF2P1213203	0	8328959
1	BICF2P954170	0	8337429
1	BICF2G630710064	0	8352934
1	TIGRP2P7835_rs8513842	0	8369669
1	TIGRP2P7837_rs8513845	0	8371377
1	TIGRP2P7842_rs9090892	0	8390379
1	TIGRP2P7844_rs8971131	0	8394376
1	BICF2G630710100	0	8411036
1	BICF2S2361515	0	8430205
1	BICF2G630710102	0	8443239
1	BICF2G630710121	0	8455231
1	BICF2G630710133	0	8463865
1	TIGRP2P7862_rs8910487	0	8477203
1	BICF2G630710183	0	8486192
1	BICF2G630710210	0	8497677
1	BICF2G630710243	0	8514900
1	BICF2P997453	0	8522934
1	BICF2G630710247	0	8532697
1	BICF2S23227425	0	8546882
1	BICF2G630710270	0	8561857
1	BICF2G630710286	0	8573470
1	BICF2G630710327	0	8595207
1	BICF2P230315	0	8604276
1	BICF2G630710345	0	8613543
1	BICF2G630710368	0	8630247
1	BICF2G630710409	0	8647033
1	BICF2G630710410	0	8647955
1	BICF2P801590	0	8679834
1	BICF2P1476	0	8697663
1	BICF2G630710467	0	8711821
1	BICF2G630710480	0	8717703
1	BICF2G630710495	0	8728624
1	BICF2S23321456	0	8746315
1	BICF2G630710527	0	8751574
1	BICF2G630710545	0	8762788
1	BICF2G630710563	0	8775014
1	BICF2G630710596	0	8798857
1	BICF2G630710611	0	8833676
1	BICF2G630710632	0	8847422
1	BICF2G630710651	0	8863032
1	BICF2G630710660	0	8870689
1	BICF2S22945143	0	8888552
1	BICF2G630710699	0	8899796
1	BICF2G630710701	0	8903354
1	BICF2G630710724	0	8926447
1	BICF2G630710733	0	8934509
1	BICF2G630710760	0	8955374
1	BICF2G630710766	0	8958598
1	BICF2G630710800	0	8975122
1	BICF2G630710810	0	8980525
1	BICF2G630710819	0	8993571
1	BICF2G630710832	0	9010909
1	BICF2G630710837	0	9017633
1	BICF2P1120946	0	9033858
1	BICF2G630710853	0	9041117
1	BICF2G630710867	0	9055097
1	BICF2P463407	0	9065606
1	BICF2G630710895	0	9075453
1	BICF2G630710917	0	9096236
1	BICF2S22931976	0	9109243
1	BICF2G630710959	0	9120663
1	BICF2P100940	0	9134130
1	BICF2P549497	0	9141313
1	BICF2G630711019	0	9159357
1	BICF2G630711036	0	9166089
1	BICF2G630711047	0	9187067
1	BICF2G630711049	0	9190035
1	BICF2G630711060	0	9201414
1	chr1_9202940	0	9202940
1	chr1_9203169	0	9203169
1	chr1_9204247	0	9204247
1	BICF2G630711067	0	9212509
1	BICF2G630711068	0	9214283
1	BICF2G630711082	0	9224106
1	BICF2G630711088	0	9240098
1	BICF2P158777	0	9257013
1	BICF2G630711094	0	9273551
1	BICF2S23513417	0	9288943
1	BICF2G630711105	0	9296248
1	TIGRP2P7951_rs9003035	0	9309123
1	TIGRP2P7957_rs9013755	0	9325658
1	BICF2P467525	0	9338347
1	TIGRP2P7974_rs8878364	0	9354482
1	BICF2G630711114	0	9362100
1	BICF2G630711115	0	9377209
1	BICF2S23620468	0	9396188
1	BICF2P823657	0	9440183
1	BICF2G630711133	0	9459731
1	BICF2P861232	0	9464337
1	BICF2P337159	0	9477943
1	BICF2G630711160	0	9486307
1	BICF2G630711166	0	9502938
1	BICF2G630711183	0	9520176
1	BICF2G630711199	0	9526549
1	BICF2G630711226	0	9540990
1	BICF2S23052776	0	9557421
1	BICF2G630711272	0	9565301
1	BICF2G630711277	0	9573293
1	BICF2G630711289	0	9578777
1	BICF2G630711302	0	9592401
1	BICF2G630711318	0	9604233
1	BICF2G630711324	0	9612915
1	BICF2G630711348	0	9638283
1	BICF2G630711365	0	9649685
1	BICF2P1182394	0	9659261
1	TIGRP2P8041_rs9097161	0	9672599
1	BICF2P231214	0	9690287
1	TIGRP2P8049_rs9045277	0	9696341
1	BICF2G630711388	0	9720002
1	BICF2P821731	0	9728738
1	TIGRP2P8074_rs9169598	0	9741629
1	BICF2P741988	0	9752154
1	TIGRP2P8083_rs8809960	0	9773189
1	BICF2P962214	0	9777156
1	BICF2G630711433	0	9799647
1	TIGRP2P8092_rs9196836	0	9812380
1	BICF2S23153877	0	9826231
1	BICF2S23514499	0	9834647
1	BICF2G630711439	0	9843203
1	BICF2S23337618	0	9862442
1	BICF2G630711446	0	9875555
1	BICF2P994359	0	9881751
1	BICF2G630711451	0	9882263
1	BICF2S23738428	0	9897935
1	BICF2G630711453	0	9909273
1	BICF2S23453035	0	9961779
1	BICF2G630711456	0	9968034
1	BICF2G630711460	0	10001661
1	TIGRP2P8121_rs9090075	0	10008027
1	BICF2G630711464	0	10027540
1	BICF2G630711468	0	10038976
1	BICF2G630711494	0	10060855
1	BICF2G630711497	0	10064727
1	BICF2S2322427	0	10093579
1	BICF2P763897	0	10099935
1	BICF2P701385	0	10107282
1	BICF2G630711516	0	10138348
1	BICF2G630711539	0	10214038
1	BICF2G630711540	0	10231948
1	BICF2G630711545	0	10238823
1	BICF2G630711562	0	10255636
1	BICF2G630711594	0	10309970
1	BICF2G630711607	0	10341135
1	BICF2S23656672	0	10357617
1	BICF2P883221	0	10403384
1	BICF2P878157	0	10508512
1	TIGRP2P8190_rs9076964	0	10549938
1	chr1_10672540	0	10672540
1	chr1_10672746	0	10672746
1	BICF2P956517	0	10699423
1	BICF2P1008542	0	10756573
1	BICF2P1014047	0	10780593
1	BICF2P59100	0	10792454
1	BICF2S2318592	0	10822495
1	BICF2P316588	0	10847607
1	BICF2P814850	0	10878370
1	BICF2S23155214	0	10898701
1	BICF2P407470	0	10934077
1	BICF2S22926875	0	10976955
1	BICF2S23731517	0	11014965
1	BICF2S2309684	0	11052005
1	BICF2S23653590	0	11074423
1	BICF2P387634	0	11091891
1	BICF2P258313	0	11097654
1	TIGRP2P8291_rs8903611	0	11111953
1	BICF2P629544	0	11119991
1	chr1_11166635	0	11166635
1	chr1_11167678	0	11167678
1	BICF2P1082366	0	11167979
1	chr1_11168555	0	11168555
1	BICF2S23731399	0	11192441
1	BICF2P304894	0	11286624
1	BICF2P258539	0	11368842
1	TIGRP2P8373_rs8521226	0	11418720
1	BICF2P380596	0	11438606
1	BICF2S23453352	0	11457128
1	BICF2S23910124	0	11465332
1	TIGRP2P8419_rs8959368	0	11497808
1	BICF2S23412474	0	11523463
1	BICF2P1108272	0	11539753
1	BICF2P631496	0	11564083
1	BICF2S2369046	0	11629081
1	BICF2S23534100	0	11653215
1	BICF2P6662	0	11679629
1	BICF2P1277523	0	11708684
1	BICF2P779428	0	11730119
1	BICF2P576377	0	11759885
1	BICF2S23114218	0	11774784
1	BICF2P340398	0	11779243
1	BICF2P654352	0	11834885
1	TIGRP2P8517_rs8894908	0	11844563
1	BICF2S23013314	0	11875141
1	TIGRP2P8538_rs8853941	0	11884008
1	TIGRP2P8553_rs8392830	0	11946797
1	TIGRP2P8555_rs8792137	0	11951448
1	BICF2P137576	0	11981850
1	TIGRP2P8588_rs8857173	0	11998945
1	BICF2S23214790	0	12007076
1	BICF2P1401451	0	12024782
1	BICF2P1283139	0	12033348
1	BICF2P107320	0	12046335
1	TIGRP2P8605_rs8516721	0	12055950
1	TIGRP2P15313_rs9161584	0	12124292
1	BICF2P1162632	0	12144103
1	BICF2P301927	0	12156624
1	chr1_12239369	0	12239369
1	BICF2P630488	0	12267375
1	BICF2P630489	0	12268168
1	BICF2P1045220	0	12292936
1	TIGRP2P15426_rs8702677	0	12305086
1	BICF2P1293785	0	12326997
1	BICF2P508412	0	12377571
1	BICF2P682714	0	12395859
1	BICF2S23530860	0	12416079
1	TIGRP2P15489_rs9216368	0	12418403
1	BICF2P296037	0	12470251
1	BICF2S23549662	0	12488548
1	BICF2P606025	0	12515484
1	BICF2S23727748	0	12674746
1	BICF2P1166615	0	12703724
1	BICF2P893554	0	12724538
1	BICF2P730971	0	12745113
1	BICF2P422182	0	12752045
1	BICF2P349940	0	12764760
1	BICF2S23417993	0	12787647
1	BICF2P248994	0	12829696
1	BICF2P363287	0	12831740
1	BICF2P669790	0	12843349
1	BICF2P1384375	0	12863961
1	BICF2S23016406	0	12868228
1	BICF2P869436	0	12880943
1	BICF2P705124	0	12891091
1	BICF2P428432	0	12926259
1	BICF2P636842	0	12946001
1	BICF2P662198	0	12954634
1	TIGRP2P15612_rs8932092	0	12960312
1	BICF2P1171448	0	12978143
1	BICF2P79987	0	12985295
1	BICF2P745908	0	13003212
1	BICF2P745909	0	13004908
1	BICF2P928162	0	13022592
1	TIGRP2P15670_rs9208301	0	13032121
1	TIGRP2P15677_rs8806610	0	13044677
1	BICF2P1170079	0	13047397
1	TIGRP2P15681_rs8498499	0	13057467
1	BICF2S23258050	0	13065849
1	BICF2P670585	0	13080533
1	BICF2P584048	0	13085178
1	BICF2P1008939	0	13104855
1	BICF2P369301	0	13115587
1	BICF2P863469	0	13128683
1	BICF2P846867	0	13132232
1	BICF2P534733	0	13137512
1	BICF2S2361901	0	13178719
1	chr1_13213824	0	13213824
1	BICF2P1260680	0	13214008
1	chr1_13223245	0	13223245
1	chr1_13223502	0	13223502
1	chr1_13233740	0	13233740
1	chr1_13234133	0	13234133
1	chr1_13234246	0	13234246
1	chr1_13234382	0	13234382
1	chr1_13234676	0	13234676
1	BICF2S2397446	0	13239142
1	chr1_13260261	0	13260261
1	BICF2S24112448	0	13266679
1	BICF2S23337862	0	13283523
1	BICF2S23762436	0	13298012
1	BICF2S23422980	0	13331028
1	chr1_13336245	0	13336245
1	chr1_13336615	0	13336615
1	BICF2S23445823	0	13347614
1	TIGRP2P15720_rs8799784	0	13355961
1	BICF2P1372927	0	13369932
1	BICF2S23354689	0	13375903
1	BICF2P897678	0	13385246
1	BICF2P1346707	0	13412399
1	BICF2P1409469	0	13428072
1	BICF2S23661189	0	13431034
1	BICF2P342283	0	13446742
1	chr1_13466714	0	13466714
1	chr1_13471714	0	13471714
1	BICF2P561513	0	13471855
1	BICF2P1240331	0	13478424
1	chr1_13481722	0	13481722
1	chr1_13493038	0	13493038
1	BICF2P1038853	0	13493435
1	BICF2P1038854	0	13493609
1	chr1_13495946	0	13495946
1	chr1_13505603	0	13505603
1	BICF2S23513984	0	13506057
1	chr1_13518860	0	13518860
1	chr1_13518974	0	13518974
1	chr1_13519154	0	13519154
1	BICF2S23224159	0	13523929
1	chr1_13525098	0	13525098
1	chr1_13526109	0	13526109
1	BICF2P915283	0	13540188
1	BICF2P1035482	0	13554172
1	BICF2P263531	0	13560487
1	TIGRP2P15804_rs9196392	0	13567459
1	BICF2S23454139	0	13568168
1	BICF2P352064	0	13585953
1	TIGRP2P15814_rs9074722	0	13601070
1	TIGRP2P15823_rs9099765	0	13629913
1	BICF2P326224	0	13635403
1	chr1_13695455	0	13695455
1	chr1_13717827	0	13717827
1	BICF2P1079359	0	13723229
1	chr1_13723779	0	13723779
1	chr1_13734423	0	13734423
1	TIGRP2P15838_rs8801024	0	13759668
1	BICF2P426201	0	13773492
1	BICF2P651874	0	13782081
1	BICF2P46311	0	13798565
1	BICF2P694207	0	13805012
1	BICF2P622051	0	13822697
1	BICF2P993746	0	13829372
1	BICF2S2436535	0	13842621
1	BICF2P396242	0	13857178
1	BICF2S22916306	0	13861908
1	BICF2P940553	0	13873480
1	BICF2P295757	0	13888539
1	TIGRP2P15885_rs8570710	0	13898860
1	BICF2P736091	0	13901500
1	BICF2S23236635	0	13901704
1	chr1_13901894	0	13901894
1	chr1_13902044	0	13902044
1	chr1_13902336	0	13902336
1	chr1_13903333	0	13903333
1	chr1_13903421	0	13903421
1	BICF2P141254	0	13912699
1	BICF2P647658	0	13932790
1	BICF2S23635165	0	13963437
1	BICF2P160224	0	13966852
1	BICF2P460868	0	13987701
1	BICF2P252171	0	14000177
1	TIGRP2P15911_rs8826086	0	14025015
1	chr1_14028097	0	14028097
1	chr1_14028691	0	14028691
1	BICF2P102423	0	14038517
1	TIGRP2P15921_rs9035080	0	14051040
1	TIGRP2P15926_rs8935881	0	14058776
1	BICF2P1438243	0	14075376
1	BICF2P300536	0	14100367
1	BICF2P69061	0	14120734
1	BICF2P931019	0	14124297
1	TIGRP2P15939_rs8638348	0	14154296
1	TIGRP2P15940_rs9048842	0	14171000
1	TIGRP2P15945_rs8794906	0	14201871
1	BICF2S2334324	0	14217295
1	BICF2S23115010	0	14226811
1	BICF2S23057675	0	14231717
1	BICF2S23515973	0	14248782
1	BICF2S23524163	0	14252712
1	BICF2S23147946	0	14281609
1	BICF2P213116	0	14287726
1	TIGRP2P15961_rs9051962	0	14316933
1	BICF2P701631	0	14323114
1	BICF2S23638404	0	14333504
1	BICF2S23031795	0	14346372
1	BICF2P956985	0	14378509
1	BICF2P985873	0	14389797
1	BICF2P510074	0	14391559
1	BICF2S23346814	0	14402319
1	BICF2S22944621	0	14416073
1	BICF2P625974	0	14429234
1	BICF2S2293000	0	14456169
1	BICF2P1036859	0	14465969
1	BICF2P1307086	0	14472225
1	TIGRP2P16009_rs9126768	0	14488488
1	BICF2S23342735	0	14494290
1	chr1_14503852	0	14503852
1	chr1_14503912	0	14503912
1	BICF2S23311738	0	14507952
1	chr1_14517554	0	14517554
1	BICF2P221798	0	14526630
1	BICF2S23537870	0	14534509
1	chr1_14535980	0	14535980
1	chr1_14536842	0	14536842
1	BICF2P1107	0	14541895
1	BICF2P355231	0	14559119
1	BICF2P355227	0	14560189
1	chr1_14614352	0	14614352
1	BICF2P1362381	0	14682573
1	BICF2P1319517	0	14708146
1	BICF2P621418	0	14718141
1	BICF2S22930792	0	14751718
1	chr1_14790538	0	14790538
1	chr1_14792233	0	14792233
1	chr1_14792615	0	14792615
1	chr1_14792692	0	14792692
1	TIGRP2P16037_rs8652110	0	14797158
1	BICF2P230951	0	14805156
1	BICF2P674288	0	14821310
1	BICF2P181859	0	14830785
1	BICF2P1102627	0	14849733
1	BICF2P646881	0	14855591
1	TIGRP2P16053_rs9041190	0	14866292
1	BICF2G630711645	0	14880841
1	BICF2G630711673	0	14892273
1	BICF2G630711678	0	14896448
1	BICF2S23630146	0	14918904
1	TIGRP2P16066_rs9123992	0	14921247
1	BICF2G630711695	0	14937979
1	BICF2G630711711	0	14950539
1	BICF2G630711718	0	14956125
1	BICF2G630711735	0	14969369
1	BICF2P658111	0	14977014
1	chr1_14986220	0	14986220
1	BICF2G630711764	0	14988276
1	BICF2G630711794	0	15005529
1	BICF2G630711817	0	15014153
1	BICF2G630711829	0	15031630
1	TIGRP2P16085_rs8540443	0	15036132
1	BICF2P1075612	0	15053383
1	BICF2G630711877	0	15057467
1	TIGRP2P16106_rs9076289	0	15080381
1	BICF2P276918	0	15098120
1	BICF2G630711952	0	15108508
1	BICF2G630711956	0	15116966
1	BICF2P1294541	0	15141151
1	BICF2G630712003	0	15160307
1	BICF2G630712032	0	15172672
1	BICF2G630712066	0	15186332
1	BICF2G630712076	0	15189413
1	BICF2S23327749	0	15207553
1	BICF2G630712167	0	15266342
1	BICF2G630712176	0	15280943
1	BICF2G630712180	0	15309118
1	BICF2G630712182	0	15321057
1	BICF2G630712183	0	15321883
1	BICF2G630712185	0	15334319
1	BICF2P1005766	0	15364978
1	BICF2G630712191	0	15372503
1	BICF2G630712210	0	15380050
1	BICF2P701174	0	15391799
1	BICF2P784323	0	15411076
1	BICF2G630712257	0	15418100
1	BICF2G630712263	0	15431051
1	BICF2G630712264	0	15436835
1	BICF2G630712269	0	15448285
1	BICF2P620330	0	15460515
1	BICF2G630712299	0	15491995
1	BICF2G630712300	0	15496312
1	TIGRP2P16163_rs9228354	0	15511136
1	BICF2S2357481	0	15517214
1	BICF2G630712331	0	15529859
1	BICF2G630712362	0	15544090
1	BICF2G630712366	0	15548491
1	BICF2G630712387	0	15553192
1	TIGRP2P16178_rs8530955	0	15566979
1	BICF2G630712428	0	15590031
1	BICF2G630712434	0	15598773
1	BICF2G630712444	0	15612220
1	BICF2S23112242	0	15624640
1	BICF2P596309	0	15635861
1	BICF2P1007324	0	15644107
1	BICF2G630712489	0	15658711
1	BICF2G630712495	0	15673409
1	BICF2G630712506	0	15688491
1	BICF2G630712518	0	15693895
1	BICF2G630712527	0	15711918
1	BICF2P1455976	0	15714469
1	BICF2P348161	0	15728099
1	BICF2S23414543	0	15736401
1	BICF2G630712556	0	15757117
1	BICF2G630712578	0	15770986
1	TIGRP2P16213_rs8686742	0	15794393
1	BICF2G630712614	0	15805483
1	BICF2P1171762	0	15816348
1	BICF2G630712641	0	15830445
1	BICF2G630712663	0	15840316
1	BICF2S23254222	0	15852260
1	BICF2S23651635	0	15874938
1	BICF2G630712750	0	15896352
1	BICF2G630712755	0	15900750
1	BICF2S23029066	0	15911482
1	BICF2G630712777	0	15920290
1	TIGRP2P16266_rs8700774	0	15920324
1	BICF2G630712815	0	15948746
1	BICF2G630712835	0	15962377
1	BICF2G630712851	0	15970326
1	chr1_15998040	0	15998040
1	chr1_16002821	0	16002821
1	chr1_16009193	0	16009193
1	BICF2S22958919	0	16013787
1	BICF2G630712884	0	16024354
1	BICF2P738529	0	16045803
1	BICF2P1239489	0	16053508
1	TIGRP2P16286_rs8968917	0	16063459
1	BICF2P1163793	0	16078323
1	BICF2G630712895	0	16082782
1	BICF2G630712899	0	16106412
1	BICF2G630712908	0	16121427
1	chr1_16132465	0	16132465
1	BICF2G630712915	0	16132998
1	BICF2G630712921	0	16138985
1	BICF2G630712979	0	16156784
1	BICF2G630712999	0	16175817
1	BICF2G630713011	0	16185504
1	BICF2G630713087	0	16231036
1	BICF2G630713106	0	16244265
1	BICF2G630713129	0	16255217
1	BICF2G630713147	0	16265331
1	BICF2G630713157	0	16281556
1	BICF2G630713161	0	16293337
1	BICF2G630713167	0	16306787
1	BICF2P1110155	0	16320005
1	BICF2G630713221	0	16324420
1	BICF2G630713238	0	16337721
1	BICF2G630713244	0	16359855
1	BICF2S23756203	0	16379257
1	BICF2G630713250	0	16399830
1	BICF2G630713257	0	16418729
1	BICF2S23312889	0	16428724
1	BICF2G630713269	0	16440171
1	BICF2G630713308	0	16460238
1	BICF2G630713309	0	16461127
1	BICF2S23911228	0	16482218
1	BICF2P347527	0	16500159
1	BICF2G630713318	0	16508273
1	BICF2G630713327	0	16523082
1	BICF2G630713341	0	16531663
1	BICF2G630713357	0	16546927
1	TIGRP2P16339_rs8847799	0	16561669
1	BICF2G630713376	0	16586375
1	BICF2S23532118	0	16591910
1	BICF2S2419179	0	16627192
1	BICF2G630713378	0	16639703
1	BICF2G630713379	0	16649665
1	BICF2G630713380	0	16663755
1	BICF2P1030733	0	16680743
1	chr1_16688757	0	16688757
1	BICF2G630713381	0	16723651
1	BICF2G630713386	0	16770912
1	BICF2G630713396	0	16780762
1	BICF2G630713400	0	16782943
1	TIGRP2P16352_rs8891819	0	16799708
1	BICF2G630713411	0	16806542
1	BICF2G630713424	0	16811874
1	BICF2S23349334	0	16812062
1	BICF2P634645	0	16819803
1	BICF2G630713443	0	16820003
1	BICF2P958503	0	16829946
1	BICF2G630713455	0	16835322
1	BICF2P798939	0	16844869
1	BICF2P191948	0	16854080
1	TIGRP2P16372_rs9041059	0	16872021
1	BICF2P391549	0	16876417
1	BICF2P279065	0	16889483
1	TIGRP2P16385_rs8513819	0	16916113
1	BICF2P893167	0	16923606
1	BICF2P518184	0	16936332
1	chr1_16944232	0	16944232
1	TIGRP2P16395_rs9237869	0	16947053
1	TIGRP2P16400_rs8609472	0	16956533
1	TIGRP2P16416_rs8992752	0	16968037
1	chr1_16975127	0	16975127
1	BICF2P190688	0	16983628
1	BICF2P1003421	0	16997869
1	BICF2P1393041	0	17003688
1	BICF2G630713467	0	17033376
1	BICF2G630713472	0	17038060
1	BICF2G630713521	0	17063159
1	chr1_17079862	0	17079862
1	BICF2P895104	0	17080855
1	BICF2S23429070	0	17081733
1	BICF2G630713549	0	17090951
1	chr1_17094403	0	17094403
1	BICF2G630713554	0	17100543
1	chr1_17108311	0	17108311
1	BICF2G630713558	0	17110373
1	chr1_17113759	0	17113759
1	BICF2G630713570	0	17125112
1	BICF2P408235	0	17128451
1	BICF2G630713595	0	17135819
1	chr1_17143743	0	17143743
1	BICF2P1049342	0	17149726
1	TIGRP2P16436_rs8508371	0	17153514
1	chr1_17154374	0	17154374
1	BICF2P537291	0	17171273
1	BICF2P518821	0	17180667
1	TIGRP2P16445_rs8874129	0	17186610
1	BICF2P673942	0	17200947
1	chr1_17208837	0	17208837
1	BICF2G630713640	0	17212415
1	BICF2G630713653	0	17220963
1	BICF2P155129	0	17236459
1	BICF2G630713680	0	17246152
1	BICF2G630713682	0	17249128
1	BICF2G630713686	0	17263074
1	BICF2P777530	0	17274039
1	BICF2G630713688	0	17278430
1	BICF2G630713712	0	17292432
1	BICF2G630713733	0	17302397
1	TIGRP2P16480_rs8758959	0	17315566
1	BICF2P1295166	0	17325705
1	BICF2G630713757	0	17336561
1	BICF2G630713782	0	17355373
1	BICF2G630713809	0	17371769
1	BICF2G630713815	0	17373241
1	chr1_17375351	0	17375351
1	BICF2G630713819	0	17376281
1	chr1_17376826	0	17376826
1	BICF2G630713834	0	17382980
1	BICF2G630713845	0	17398182
1	BICF2G630713855	0	17409289
1	BICF2P764755	0	17419125
1	TIGRP2P16525_rs8882612	0	17443755
1	chr1_17445618	0	17445618
1	BICF2G630713890	0	17446347
1	chr1_17446766	0	17446766
1	BICF2G630713894	0	17451480
1	BICF2G630713904	0	17463345
1	chr1_17464549	0	17464549
1	BICF2G630713905	0	17464820
1	BICF2G630713917	0	17480289
1	BICF2P734435	0	17490068
1	BICF2P734437	0	17490326
1	BICF2G630713926	0	17490618
1	chr1_17491056	0	17491056
1	chr1_17491317	0	17491317
1	BICF2G630713973	0	17510437
1	chr1_17524359	0	17524359
1	BICF2G630713998	0	17524497
1	chr1_17524506	0	17524506
1	chr1_17525427	0	17525427
1	chr1_17525501	0	17525501
1	chr1_17525603	0	17525603
1	BICF2G630714004	0	17525730
1	BICF2G630714008	0	17526195
1	BICF2G630714009	0	17526463
1	BICF2P162205	0	17526522
1	chr1_17526702	0	17526702
1	BICF2S23425898	0	17536104
1	BICF2P952022	0	17548401
1	BICF2P864404	0	17557024
1	BICF2G630714030	0	17575316
1	BICF2S23037200	0	17587551
1	BICF2S23047697	0	17589724
1	BICF2G630714047	0	17610117
1	BICF2G630714052	0	17612158
1	chr1_17629250	0	17629250
1	chr1_17629899	0	17629899
1	BICF2G630714066	0	17630626
1	BICF2G630714067	0	17631263
1	BICF2G630714068	0	17631438
1	chr1_17631987	0	17631987
1	BICF2G630714071	0	17633594
1	BICF2G630714072	0	17633819
1	BICF2G630714076	0	17635786
1	BICF2G630714081	0	17646203
1	BICF2S22954480	0	17659479
1	BICF2G630714100	0	17667781
1	BICF2S23435772	0	17688017
1	BICF2P339458	0	17692763
1	BICF2P1223885	0	17704361
1	BICF2P709584	0	17709766
1	BICF2P172537	0	17712307
1	BICF2G630714103	0	17726062
1	BICF2G630714105	0	17726883
1	BICF2G630714118	0	17743906
1	BICF2G630714129	0	17750078
1	BICF2G630714145	0	17765993
1	TIGRP2P16600_rs8818545	0	17773356
1	BICF2G630714153	0	17786696
1	BICF2G630714169	0	17796222
1	BICF2G630714176	0	17808236
1	BICF2G630714188	0	17824831
1	BICF2G630714206	0	17840485
1	BICF2P1465145	0	17846763
1	TIGRP2P16613_rs9171180	0	17860709
1	BICF2G630714226	0	17870438
1	BICF2G630714233	0	17889488
1	BICF2G630714236	0	17903166
1	BICF2P846937	0	17911755
1	BICF2S23427278	0	17927062
1	BICF2G630714275	0	17939101
1	BICF2G630714292	0	17952061
1	BICF2P478930	0	17956021
1	BICF2P1009249	0	17963447
1	TIGRP2P16637_rs9039773	0	17972306
1	BICF2G630714328	0	17981639
1	TIGRP2P16643_rs9089258	0	17998067
1	BICF2G630714331	0	18006152
1	TIGRP2P16648_rs9203177	0	18015181
1	TIGRP2P16656_rs9062503	0	18036411
1	TIGRP2P16661_rs8631863	0	18039988
1	BICF2G630714377	0	18050538
1	BICF2G630714387	0	18067220
1	BICF2G630714411	0	18079007
1	BICF2G630714416	0	18085253
1	TIGRP2P16671_rs9202034	0	18095245
1	BICF2S23221565	0	18107386
1	BICF2G630714480	0	18120975
1	BICF2S2333765	0	18131176
1	BICF2G630714487	0	18142442
1	BICF2G630714502	0	18154349
1	BICF2P802180	0	18164999
1	BICF2G630714515	0	18176849
1	BICF2G630714529	0	18196519
1	BICF2G630714538	0	18201249
1	BICF2G630714543	0	18212723
1	TIGRP2P16698_rs8970755	0	18230234
1	BICF2G630714585	0	18233230
1	BICF2G630714599	0	18246942
1	BICF2G630714618	0	18257851
1	chr1_18265182	0	18265182
1	BICF2P822605	0	18268077
1	BICF2P431281	0	18271867
1	chr1_18279197	0	18279197
1	BICF2P363533	0	18279276
1	BICF2P1341927	0	18301303
1	BICF2G630714631	0	18330993
1	BICF2G630714635	0	18337458
1	BICF2P1153297	0	18337681
1	chr1_18338112	0	18338112
1	BICF2S23754080	0	18351745
1	BICF2G630714647	0	18360583
1	BICF2G630714657	0	18372431
1	BICF2S23735739	0	18383320
1	BICF2S2303742	0	18394807
1	BICF2G630714678	0	18408043
1	BICF2G630714699	0	18417394
1	BICF2G630714715	0	18436498
1	BICF2G630714718	0	18440810
1	BICF2S23256308	0	18453404
1	BICF2S23148503	0	18464410
1	BICF2G630714751	0	18481237
1	chr1_18487508	0	18487508
1	BICF2G630714759	0	18491257
1	BICF2G630714765	0	18498485
1	BICF2G630714786	0	18514470
1	BICF2G630714787	0	18524177
1	BICF2G630714800	0	18543235
1	BICF2G630714801	0	18544398
1	BICF2P626377	0	18559607
1	TIGRP2P16741_rs8775542	0	18588383
1	TIGRP2P16748_rs9167563	0	18593202
1	BICF2P518563	0	18603592
1	BICF2S22914470	0	18618404
1	BICF2P974068	0	18624247
1	BICF2S23426949	0	18643135
1	BICF2G630714841	0	18652876
1	BICF2P508940	0	18662684
1	BICF2G630714876	0	18679747
1	BICF2G630714883	0	18689187
1	BICF2S23753581	0	18711288
1	BICF2S23014337	0	18724532
1	BICF2S22937286	0	18727675
1	BICF2G630714898	0	18738968
1	BICF2G630714912	0	18753645
1	BICF2G630714954	0	18772717
1	BICF2S2376916	0	18773975
1	BICF2P1238594	0	18788595
1	BICF2P34866	0	18799421
1	BICF2S23110908	0	18811386
1	BICF2P563895	0	18835955
1	chr1_18855187	0	18855187
1	chr1_18865258	0	18865258
1	chr1_18891545	0	18891545
1	chr1_18908939	0	18908939
1	BICF2P1113084	0	18973503
1	BICF2G630714964	0	19002760
1	BICF2P208503	0	19015038
1	BICF2P1224492	0	19035158
1	BICF2P897761	0	19109733
1	BICF2P507242	0	19153101
1	BICF2S22954521	0	19165031
1	BICF2P1197165	0	19176612
1	TIGRP2P16796_rs8980048	0	19191686
1	chr1_19195291	0	19195291
1	BICF2S231429	0	19209043
1	TIGRP2P16815_rs9100025	0	19229815
1	BICF2P62879	0	19231810
1	BICF2G630714968	0	19231838
1	BICF2P1225994	0	19238089
1	BICF2P438420	0	19247015
1	BICF2S23518964	0	19260476
1	BICF2S23026603	0	19281794
1	BICF2S23010890	0	19312763
1	BICF2S23021320	0	19316603
1	BICF2S2413105	0	19361613
1	BICF2P86167	0	19371454
1	BICF2S23451625	0	19385401
1	TIGRP2P16848_rs8955685	0	19399416
1	BICF2P753865	0	19406222
1	BICF2G630714985	0	19418649
1	BICF2G630715002	0	19430743
1	BICF2G630715025	0	19444356
1	BICF2P1167150	0	19458982
1	BICF2P284095	0	19474422
1	BICF2G630715029	0	19483125
1	BICF2G630715032	0	19492481
1	BICF2G630715037	0	19503280
1	BICF2S2291054	0	19515473
1	BICF2P1057541	0	19528106
1	BICF2S23453175	0	19534046
1	BICF2P1284504	0	19545293
1	BICF2G630715088	0	19568314
1	BICF2G630715114	0	19585555
1	BICF2G630715122	0	19594047
1	BICF2P612910	0	19602289
1	BICF2S23024405	0	19615058
1	BICF2G630715150	0	19626625
1	BICF2G630715169	0	19636509
1	BICF2P348329	0	19641020
1	BICF2G630715179	0	19652084
1	BICF2G630715194	0	19667530
1	BICF2G630715208	0	19670479
1	TIGRP2P16901_rs8842380	0	19685669
1	BICF2P1095628	0	19699633
1	BICF2P788591	0	19709660
1	BICF2P287600	0	19719094
1	BICF2P278076	0	19739556
1	TIGRP2P16921_rs9138076	0	19742741
1	BICF2S23526960	0	19757907
1	BICF2P10724	0	19763752
1	BICF2G630715220	0	19776432
1	BICF2G630715227	0	19790760
1	BICF2P130613	0	19808623
1	BICF2G630715229	0	19846552
1	TIGRP2P16932_rs8832082	0	19857021
1	BICF2G630715241	0	19870526
1	BICF2G630715255	0	19883562
1	TIGRP2P16934_rs8969178	0	19891923
1	BICF2G630715277	0	19904981
1	BICF2P1246032	0	19916674
1	BICF2G630715283	0	19932466
1	BICF2G630715288	0	19934494
1	BICF2P355578	0	19936943
1	BICF2S22962111	0	19968487
1	BICF2S23516429	0	19972335
1	BICF2G630715293	0	19984274
1	BICF2P872985	0	19999160
1	BICF2S22962263	0	20015759
1	BICF2P1398938	0	20032821
1	BICF2P802066	0	20040189
1	BICF2P986779	0	20054348
1	BICF2P1463282	0	20068199
1	BICF2G630715296	0	20077410
1	BICF2G630715316	0	20088635
1	TIGRP2P16955_rs8609970	0	20101318
1	BICF2G630715335	0	20105332
1	BICF2G630715342	0	20110472
1	TIGRP2P16957_rs8951988	0	20124514
1	BICF2P1321333	0	20135704
1	BICF2G630715354	0	20161099
1	BICF2G630715359	0	20167563
1	BICF2G630715374	0	20187696
1	BICF2P310418	0	20193561
1	BICF2P1239941	0	20202305
1	BICF2P967900	0	20219208
1	BICF2S23248133	0	20228210
1	BICF2G630715379	0	20247782
1	TIGRP2P16961_rs9025176	0	20259753
1	BICF2G630715394	0	20282115
1	BICF2G630715397	0	20292792
1	BICF2G630715407	0	20304931
1	BICF2P697771	0	20336471
1	TIGRP2P16971_rs9175448	0	20341163
1	BICF2P1059685	0	20360804
1	BICF2P1187622	0	20366768
1	BICF2P457349	0	20382519
1	TIGRP2P16976_rs9075007	0	20387883
1	BICF2P727704	0	20425939
1	TIGRP2P16985_rs8552105	0	20450940
1	TIGRP2P16987_rs8696649	0	20458059
1	BICF2P701461	0	20479325
1	BICF2S2295750	0	20513461
1	BICF2S22925209	0	20523711
1	BICF2P2581	0	20549601
1	BICF2P1167162	0	20574858
1	BICF2S2451719	0	20592090
1	BICF2P895704	0	20625819
1	BICF2P676479	0	20638142
1	BICF2P962056	0	20659006
1	BICF2P266321	0	20679215
1	BICF2P571844	0	20687372
1	BICF2P571843	0	20687937
1	BICF2P77912	0	20695934
1	BICF2S23345156	0	20708751
1	BICF2S2307217	0	20718841
1	BICF2P1146952	0	20735772
1	BICF2S23341996	0	20751208
1	BICF2P251560	0	20766917
1	BICF2S23351495	0	20781808
1	BICF2P804494	0	20814625
1	BICF2P996479	0	20824994
1	BICF2P153285	0	20840797
1	BICF2S23635196	0	20851127
1	BICF2P1127851	0	20868404
1	BICF2P1273223	0	20892062
1	chr1_20901318	0	20901318
1	chr1_20901611	0	20901611
1	chr1_20907142	0	20907142
1	BICF2P1336125	0	20947142
1	G14f79S67	0	20987464
1	BICF2S24412875	0	21002632
1	BICF2S2394642	0	21023551
1	BICF2S2333879	0	21069228
1	BICF2S23332886	0	21081326
1	BICF2S2419977	0	21088910
1	BICF2P929289	0	21099824
1	chr1_21114973	0	21114973
1	chr1_21120626	0	21120626
1	BICF2S23327741	0	21141240
1	BICF2S23915542	0	21178618
1	BICF2P1410756	0	21186536
1	chr1_21190542	0	21190542
1	chr1_21200407	0	21200407
1	BICF2P130851	0	21222091
1	BICF2S23750897	0	21234762
1	chr1_21275860	0	21275860
1	chr1_21283328	0	21283328
1	chr1_21284697	0	21284697
1	chr1_21290413	0	21290413
1	BICF2P1013714	0	21303540
1	BICF2P336625	0	21305612
1	BICF2P914703	0	21326275
1	BICF2P914697	0	21328310
1	BICF2P64506	0	21339611
1	BICF2P663230	0	21357214
1	TIGRP2P17044_rs8716029	0	21363606
1	TIGRP2P17048_rs8850414	0	21376067
1	BICF2P1003867	0	21393173
1	TIGRP2P17059_rs8886848	0	21404855
1	BICF2P21190	0	21426179
1	BICF2P794751	0	21433114
1	BICF2S2342471	0	21442964
1	BICF2P222001	0	21457490
1	BICF2P572030	0	21482426
1	BICF2S23239350	0	21508750
1	BICF2P863862	0	21545361
1	BICF2S2397357	0	21558184
1	BICF2P793381	0	21574051
1	BICF2S23241120	0	21612216
1	BICF2S23720055	0	21640035
1	chr1_21656194	0	21656194
1	chr1_21660787	0	21660787
1	chr1_21706948	0	21706948
1	BICF2P373354	0	21720247
1	BICF2P757392	0	21739547
1	BICF2P1430501	0	21743886
1	BICF2P321041	0	21759367
1	BICF2P1409861	0	21768258
1	BICF2P550254	0	21779972
1	BICF2S23426242	0	21796081
1	BICF2S23330661	0	21810391
1	BICF2P419907	0	21830087
1	TIGRP2P17125_rs8941216	0	21841917
1	BICF2P812791	0	21855124
1	BICF2P812795	0	21856668
1	BICF2P317022	0	21875503
1	BICF2P789154	0	21888516
1	BICF2P678656	0	21895847
1	BICF2S22939627	0	21911233
1	BICF2P556351	0	21930339
1	BICF2P556348	0	21930858
1	BICF2S23510354	0	21939956
1	BICF2P560946	0	21951080
1	BICF2S23444701	0	21968494
1	BICF2P270859	0	21974369
1	BICF2P945211	0	22003486
1	BICF2P585237	0	22006916
1	BICF2S22930824	0	22018645
1	BICF2P570525	0	22046002
1	BICF2S2394301	0	22046657
1	BICF2S23634186	0	22051495
1	BICF2S23251261	0	22062401
1	TIGRP2P17171_rs8722368	0	22091645
1	BICF2P807085	0	22099323
1	BICF2P504694	0	22115291
1	BICF2P1155251	0	22132707
1	BICF2P1036256	0	22180137
1	TIGRP2P17199_rs8966927	0	22189988
1	BICF2P1306592	0	22222394
1	BICF2P1333923	0	22235845
1	BICF2S23611572	0	22249905
1	BICF2S23147386	0	22261510
1	BICF2P988426	0	22280404
1	BICF2P864879	0	22296505
1	BICF2P227551	0	22322240
1	BICF2P748505	0	22333250
1	BICF2P735889	0	22342955
1	TIGRP2P17211_rs8916416	0	22349515
1	BICF2S23123355	0	22362391
1	BICF2P1200623	0	22380173
1	BICF2S23333471	0	22385198
1	BICF2P431438	0	22399006
1	BICF2P667035	0	22401970
1	TIGRP2P17237_rs8933516	0	22409611
1	BICF2P1052320	0	22414085
1	BICF2P300236	0	22419943
1	BICF2P980143	0	22428452
1	BICF2P1048615	0	22439720
1	BICF2P937362	0	22450312
1	BICF2S22935701	0	22453484
1	BICF2P576323	0	22459007
1	BICF2P162730	0	22469558
1	BICF2P603100	0	22477978
1	BICF2P188992	0	22535450
1	BICF2P947428	0	22550996
1	BICF2S23422558	0	22567562
1	BICF2P708339	0	22576847
1	BICF2S2454320	0	22580584
1	BICF2P1054180	0	22591074
1	TIGRP2P17293_rs8572285	0	22602310
1	BICF2P57650	0	22614424
1	TIGRP2P17321_rs8841781	0	22626734
1	BICF2P1047026	0	22640635
1	BICF2S23548131	0	22650364
1	TIGRP2P17336_rs8925170	0	22664957
1	TIGRP2P17344_rs8865764	0	22675364
1	TIGRP2P17362_rs9115889	0	22687621
1	BICF2P336857	0	22687856
1	BICF2P841789	0	22695450
1	BICF2P115553	0	22715597
1	TIGRP2P17376_rs8899111	0	22724505
1	BICF2S2453431	0	22732375
1	BICF2P1302500	0	22740877
1	BICF2P321749	0	22778046
1	BICF2P914059	0	22787221
1	BICF2P618957	0	22800993
1	BICF2S22924448	0	22810136
1	TIGRP2P17418_rs8860289	0	22823138
1	TIGRP2P17422_rs8791254	0	22832245
1	BICF2S23158753	0	22857427
1	BICF2S2307677	0	22866287
1	BICF2P1229239	0	22879445
1	BICF2P660010	0	22894623
1	BICF2P495736	0	22922850
1	BICF2S2322928	0	22932586
1	BICF2S23522883	0	22935983
1	BICF2P613102	0	22959909
1	BICF2S23616573	0	22978436
1	BICF2S23214892	0	22989459
1	BICF2P568831	0	23011200
1	BICF2P435184	0	23017214
1	BICF2S2377633	0	23044893
1	TIGRP2P17474_rs8805327	0	23060455
1	BICF2S23527626	0	23066248
1	BICF2P327379	0	23079472
1	BICF2P136634	0	23100380
1	BICF2S23238220	0	23108674
1	BICF2S23642345	0	23123610
1	BICF2P1312108	0	23131454
1	BICF2P795809	0	23146910
1	BICF2P395048	0	23161548
1	BICF2P1387646	0	23183714
1	TIGRP2P17514_rs8550265	0	23183736
1	BICF2P305122	0	23189547
1	BICF2P1470220	0	23204599
1	BICF2P1389936	0	23211687
1	BICF2P543716	0	23223054
1	BICF2P1446571	0	23246076
1	BICF2P94046	0	23258920
1	BICF2P291553	0	23270803
1	BICF2P30700	0	23283703
1	BICF2P1342706	0	23285268
1	BICF2P1342708	0	23285940
1	BICF2P597923	0	23292256
1	TIGRP2P17586_rs9097220	0	23300383
1	TIGRP2P17593_rs8591336	0	23307505
1	BICF2P1218551	0	23316876
1	chr1_23322720	0	23322720
1	chr1_23337892	0	23337892
1	chr1_23359471	0	23359471
1	chr1_23362139	0	23362139
1	chr1_23372932	0	23372932
1	chr1_23377302	0	23377302
1	chr1_23388583	0	23388583
1	BICF2S23152929	0	23394565
1	BICF2S22935806	0	23404515
1	BICF2S23632260	0	23411109
1	TIGRP2P17614_rs8918615	0	23422411
1	BICF2P512232	0	23435797
1	BICF2S2375452	0	23446470
1	TIGRP2P17632_rs9227617	0	23453064
1	BICF2S23634487	0	23494929
1	BICF2S2293066	0	23498852
1	TIGRP2P17660_rs8986102	0	23514610
1	BICF2P1101627	0	23522736
1	BICF2P878699	0	23531720
1	BICF2P513740	0	23535172
1	BICF2P273562	0	23560780
1	TIGRP2P17697_rs9034515	0	23579207
1	TIGRP2P17699_rs8654280	0	23581336
1	TIGRP2P17703_rs8968872	0	23595189
1	TIGRP2P17708_rs8540808	0	23613953
1	TIGRP2P17710_rs8808553	0	23618996
1	BICF2S23245609	0	23625329
1	BICF2P489911	0	23634519
1	BICF2P646699	0	23641880
1	BICF2S23122749	0	23652028
1	BICF2P96122	0	23670388
1	BICF2P326270	0	23675365
1	BICF2P864792	0	23694197
1	BICF2P1456437	0	23701799
1	BICF2P1387961	0	23706644
1	BICF2P1005323	0	23718020
1	BICF2P532862	0	23730311
1	BICF2P617553	0	23747015
1	BICF2S22959028	0	23754226
1	BICF2P787778	0	23773565
1	TIGRP2P17768_rs8697988	0	23776404
1	BICF2P1159715	0	23776600
1	BICF2P746922	0	23798188
1	BICF2P266322	0	23804103
1	BICF2P342466	0	23814422
1	BICF2P38366	0	23821683
1	BICF2P131444	0	23834410
1	chr1_23837049	0	23837049
1	BICF2P467012	0	23838138
1	BICF2P182997	0	23870986
1	BICF2P1352939	0	23880227
1	BICF2P1066402	0	23894323
1	BICF2P404381	0	23919059
1	BICF2P476925	0	23941533
1	BICF2P1415237	0	23980200
1	BICF2P31057	0	23983740
1	BICF2P990644	0	23985816
1	BICF2P990643	0	23985891
1	BICF2P109947	0	24001477
1	BICF2S2327284	0	24024856
1	BICF2P478548	0	24032460
1	BICF2P1266261	0	24042626
1	BICF2P808960	0	24056431
1	BICF2P39743	0	24065845
1	BICF2P238459	0	24076060
1	BICF2S22937618	0	24083930
1	BICF2S2323172	0	24088277
1	chr1_24091629	0	24091629
1	chr1_24091736	0	24091736
1	BICF2P923443	0	24092203
1	TIGRP2P17803_rs8957491	0	24097438
1	BICF2P1248996	0	24143018
1	BICF2P746146	0	24158740
1	BICF2P670473	0	24174220
1	BICF2P164914	0	24184515
1	BICF2P887554	0	24192886
1	TIGRP2P17861_rs8712869	0	24211435
1	BICF2P1283451	0	24222155
1	BICF2P508912	0	24257314
1	TIGRP2P17893_rs9237063	0	24272711
1	TIGRP2P17898_rs9244221	0	24301367
1	BICF2P1396496	0	24322562
1	BICF2P403360	0	24336537
1	TIGRP2P17917_rs9241698	0	24343355
1	BICF2P29694	0	24344208
1	BICF2P1121391	0	24351971
1	BICF2P1140956	0	24364734
1	BICF2P491494	0	24387112
1	chr1_24391112	0	24391112
1	BICF2P674878	0	24417633
1	BICF2P871223	0	24427550
1	chr1_24430516	0	24430516
1	chr1_24430529	0	24430529
1	BICF2S2364433	0	24442215
1	BICF2S23614279	0	24443343
1	BICF2P110457	0	24481087
1	BICF2S22929236	0	24516067
1	BICF2P753060	0	24528357
1	chr1_24540921	0	24540921
1	BICF2P672688	0	24544483
1	BICF2P145622	0	24554257
1	chr1_24557788	0	24557788
1	BICF2P553300	0	24570506
1	BICF2P22721	0	24597626
1	TIGRP2P17956_rs8846836	0	24604895
1	BICF2P281121	0	24617129
1	BICF2P170125	0	24621078
1	BICF2S22933315	0	24643635
1	BICF2P836026	0	24647704
1	TIGRP2P17997_rs9161652	0	24656606
1	BICF2P1011763	0	24671994
1	BICF2P368321	0	24682991
1	BICF2P649420	0	24693843
1	BICF2S23243385	0	24710385
1	BICF2P620453	0	24718405
1	BICF2P1330507	0	24724808
1	TIGRP2P18057_rs9175538	0	24738416
1	TIGRP2P18062_rs8842318	0	24752248
1	BICF2P499692	0	24763508
1	BICF2P871082	0	24785843
1	BICF2P241728	0	24795748
1	BICF2P962739	0	24818023
1	BICF2P730278	0	24845873
1	TIGRP2P18091_rs9135091	0	24856757
1	BICF2P1272208	0	24872931
1	BICF2P970147	0	24893106
1	BICF2P238715	0	24899952
1	BICF2P626688	0	24910448
1	BICF2P1382837	0	24920047
1	BICF2P935861	0	24927539
1	BICF2S22960046	0	24931996
1	BICF2P176852	0	24945204
1	BICF2P252854	0	24970579
1	BICF2P695568	0	24983079
1	TIGRP2P18142_rs9093042	0	24992048
1	BICF2P859065	0	25004053
1	chr1_25008928	0	25008928
1	chr1_25014517	0	25014517
1	BICF2P1347877	0	25019806
1	BICF2P295909	0	25034144
1	BICF2P3694	0	25044771
1	BICF2S23016234	0	25074448
1	BICF2P532348	0	25085967
1	TIGRP2P18250_rs9019380	0	25102777
1	chr1_25113655	0	25113655
1	chr1_25114117	0	25114117
1	chr1_25114740	0	25114740
1	BICF2P680416	0	25150177
1	BICF2P167452	0	25160976
1	BICF2P749396	0	25170160
1	BICF2P189468	0	25194331
1	TIGRP2P18216_rs9089672	0	25198374
1	BICF2S23547999	0	25209356
1	BICF2S23745469	0	25241659
1	BICF2P680865	0	25260410
1	BICF2S23151346	0	25272480
1	BICF2P19923	0	25283409
1	BICF2S23044886	0	25289422
1	BICF2P507939	0	25311038
1	TIGRP2P18186_rs9139000	0	25351538
1	BICF2P235331	0	25365975
1	chr1_25387348	0	25387348
1	BICF2P735708	0	25401240
1	BICF2P95142	0	25403284
1	BICF2P192035	0	25417099
1	BICF2P770471	0	25425802
1	BICF2P1261840	0	25429475
1	TIGRP2P18165_rs9079841	0	25446101
1	BICF2P445620	0	25448763
1	TIGRP2P18162_rs8546859	0	25449974
1	TIGRP2P18159_rs9179649	0	25470326
1	BICF2P642679	0	25483781
1	TIGRP2P18148_rs9090040	0	25510229
1	chr1_25510693	0	25510693
1	BICF2P488457	0	25524462
1	BICF2S23914759	0	25547188
1	chr1_25558695	0	25558695
1	chr1_25559797	0	25559797
1	chr1_25561677	0	25561677
1	BICF2P534512	0	25563427
1	BICF2S23639269	0	25565128
1	TIGRP2P18272_rs8945373	0	25580144
1	BICF2P482758	0	25609435
1	BICF2P1110880	0	25610621
1	BICF2P179617	0	25621297
1	TIGRP2P18335_rs8944574	0	25638139
1	BICF2P729748	0	25645025
1	BICF2P228800	0	25659010
1	TIGRP2P18356_rs9196916	0	25671994
1	BICF2P1159509	0	25770887
1	BICF2S22920343	0	25793141
1	BICF2P578621	0	25798483
1	chr1_25810445	0	25810445
1	chr1_25820617	0	25820617
1	chr1_25820717	0	25820717
1	chr1_25830795	0	25830795
1	TIGRP2P18465_rs9049550	0	25838266
1	BICF2P831459	0	25851893
1	TIGRP2P18485_rs9026230	0	25874646
1	BICF2P153028	0	25889659
1	BICF2S23223288	0	25911818
1	BICF2S2368997	0	25931311
1	BICF2P1127399	0	25933320
1	BICF2P879617	0	25973253
1	BICF2P978174	0	25979361
1	BICF2S23327581	0	25993251
1	BICF2P608397	0	26011430
1	TIGRP2P18522_rs8991242	0	26012685
1	BICF2P145081	0	26025701
1	BICF2P739304	0	26044599
1	BICF2P1196969	0	26055085
1	BICF2P1004684	0	26072659
1	TIGRP2P18560_rs8968769	0	26088534
1	TIGRP2P18562_rs9006844	0	26095136
1	BICF2P112678	0	26104827
1	BICF2S23720329	0	26120031
1	TIGRP2P18583_rs8963033	0	26144928
1	TIGRP2P18586_rs8746233	0	26156743
1	BICF2P1031161	0	26170953
1	BICF2P350944	0	26180965
1	TIGRP2P18606_rs8693206	0	26193421
1	TIGRP2P18613_rs9202115	0	26207215
1	BICF2S22929941	0	26208251
1	BICF2P113807	0	26224100
1	TIGRP2P18640_rs8637455	0	26240082
1	BICF2P1281735	0	26250939
1	BICF2S23147938	0	26261913
1	BICF2S2349447	0	26266774
1	BICF2S23346193	0	26288257
1	BICF2P708562	0	26293324
1	BICF2P540510	0	26307304
1	BICF2P289000	0	26313474
1	TIGRP2P18681_rs8819369	0	26330301
1	BICF2P715633	0	26341631
1	BICF2P194937	0	26346238
1	TIGRP2P18697_rs8681113	0	26358331
1	BICF2P186600	0	26368937
1	BICF2P848519	0	26384196
1	BICF2P270493	0	26408125
1	BICF2S23143309	0	26438930
1	chr1_26448564	0	26448564
1	BICF2P754027	0	26457060
1	BICF2P237190	0	26482551
1	BICF2P1054089	0	26485950
1	BICF2P378388	0	26505421
1	chr1_26512250	0	26512250
1	chr1_26513549	0	26513549
1	chr1_26513925	0	26513925
1	BICF2P1028887	0	26516342
1	BICF2P104206	0	26523535
1	chr1_26546595	0	26546595
1	TIGRP2P18720_rs8770839	0	26599683
1	BICF2S2343850	0	26630051
1	BICF2P164200	0	26646523
1	BICF2S2342031	0	26672433
1	BICF2P747716	0	26705395
1	BICF2P1405357	0	26725767
1	BICF2P1164085	0	26736172
1	BICF2P806301	0	26746809
1	TIGRP2P18760_rs9010994	0	26763919
1	TIGRP2P18772_rs8491774	0	26775069
1	BICF2P218761	0	26803305
1	BICF2P855768	0	26813680
1	TIGRP2P18790_rs8931387	0	26815178
1	BICF2S23763366	0	26837876
1	BICF2P694060	0	26839731
1	BICF2P142422	0	26854446
1	BICF2S23021022	0	26861885
1	BICF2P1433886	0	26863343
1	BICF2P1330354	0	26882485
1	TIGRP2P18815_rs8589232	0	26884664
1	BICF2P1090887	0	26901420
1	BICF2S23116581	0	26948120
1	BICF2P733884	0	26948939
1	BICF2P53922	0	26956206
1	TIGRP2P18839_rs9045635	0	26964727
1	BICF2P923600	0	26974225
1	BICF2P1326699	0	26982618
1	chr1_26993784	0	26993784
1	BICF2P73644	0	26999228
1	BICF2P34858	0	27010505
1	TIGRP2P819_rs8979721	0	27032573
1	BICF2P956880	0	27036608
1	TIGRP2P838_rs8650510	0	27050001
1	BICF2P60083	0	27065775
1	BICF2P405685	0	27072157
1	BICF2P865928	0	27075592
1	BICF2S23411231	0	27082072
1	TIGRP2P868_rs8587119	0	27109036
1	TIGRP2P871_rs8681644	0	27115230
1	BICF2P415787	0	27131601
1	BICF2S2327345	0	27140281
1	BICF2S23323455	0	27159789
1	TIGRP2P877_rs8968905	0	27181416
1	BICF2P859260	0	27189938
1	BICF2S23112732	0	27198757
1	BICF2P162496	0	27209577
1	BICF2S22913108	0	27225262
1	BICF2P1008811	0	27239311
1	BICF2P744008	0	27263289
1	TIGRP2P904_rs9168447	0	27279310
1	BICF2P1167327	0	27286844
1	BICF2S2379011	0	27300794
1	BICF2P229464	0	27326422
1	BICF2P1131127	0	27332974
1	TIGRP2P931_rs9001804	0	27350928
1	BICF2P1349635	0	27357008
1	BICF2P304995	0	27367488
1	BICF2P395928	0	27387938
1	BICF2P695172	0	27393839
1	BICF2S2305511	0	27412979
1	TIGRP2P953_rs9088120	0	27429862
1	BICF2S23131087	0	27457651
1	BICF2S23341762	0	27469100
1	BICF2S23124613	0	27474445
1	BICF2S23437590	0	27490392
1	BICF2S23125839	0	27506312
1	BICF2S23722397	0	27516846
1	BICF2P1370706	0	27532770
1	BICF2P299445	0	27542326
1	TIGRP2P983_rs8538935	0	27558586
1	BICF2S23523710	0	27564457
1	BICF2P483954	0	27574029
1	TIGRP2P992_rs8745765	0	27596835
1	TIGRP2P999_rs8916154	0	27615568
1	BICF2S2346124	0	27620600
1	BICF2S2301136	0	27632471
1	BICF2P546156	0	27645842
1	BICF2S22955746	0	27647170
1	BICF2P85699	0	27658799
1	chr1_27669150	0	27669150
1	chr1_27669668	0	27669668
1	BICF2P408519	0	27670053
1	chr1_27670109	0	27670109
1	BICF2S24315845	0	27670873
1	TIGRP2P1006_rs8933611	0	27671838
1	TIGRP2P1008_rs8933612	0	27672801
1	chr1_27673418	0	27673418
1	BICF2P940035	0	27676725
1	BICF2P583409	0	27682559
1	chr1_27683104	0	27683104
1	chr1_27691164	0	27691164
1	chr1_27691220	0	27691220
1	BICF2S23441292	0	27698746
1	chr1_27701973	0	27701973
1	chr1_27702948	0	27702948
1	chr1_27704076	0	27704076
1	chr1_27704641	0	27704641
1	TIGRP2P1024_rs9175268	0	27716002
1	BICF2S22916737	0	27722553
1	chr1_27737663	0	27737663
1	BICF2P210343	0	27739280
1	BICF2P980151	0	27742866
1	BICF2S23049006	0	27752548
1	BICF2S22928909	0	27761602
1	BICF2P1349170	0	27802832
1	BICF2S23056678	0	27810863
1	BICF2S23323875	0	27819151
1	BICF2S22937287	0	27832093
1	BICF2P807649	0	27843424
1	BICF2P241681	0	27860195
1	BICF2P1135047	0	27865896
1	BICF2G630715491	0	27877028
1	BICF2G630715496	0	27888848
1	BICF2P183706	0	27901798
1	BICF2G630715508	0	27914356
1	BICF2G630715510	0	27924114
1	BICF2P633602	0	27945221
1	BICF2G630715524	0	27963241
1	BICF2G630715530	0	27967727
1	BICF2P230124	0	27987683
1	BICF2P28211	0	27990175
1	chr1_27992184	0	27992184
1	BICF2G630715573	0	28000311
1	BICF2P333833	0	28032774
1	BICF2P187123	0	28041247
1	BICF2P453927	0	28052620
1	BICF2G630715577	0	28069667
1	BICF2G630715580	0	28085701
1	BICF2G630715594	0	28113464
1	BICF2G630715598	0	28116668
1	chr1_28147846	0	28147846
1	BICF2P822253	0	28150918
1	chr1_28166912	0	28166912
1	BICF2G630715640	0	28190579
1	chr1_28191554	0	28191554
1	BICF2G630715643	0	28197783
1	BICF2G630715646	0	28212587
1	BICF2S23617497	0	28233414
1	BICF2G630715649	0	28249459
1	BICF2G630715654	0	28264651
1	BICF2S23017989	0	28285385
1	BICF2G630715668	0	28306131
1	BICF2G630715714	0	28322353
1	BICF2G630715720	0	28334597
1	BICF2G630715756	0	28368785
1	BICF2G630715776	0	28386038
1	BICF2G630715782	0	28394962
1	BICF2G630715800	0	28402306
1	chr1_28449172	0	28449172
1	BICF2G630715807	0	28462550
1	BICF2G630715808	0	28467560
1	BICF2G630715810	0	28474148
1	BICF2G630715811	0	28496226
1	BICF2G630715814	0	28508765
1	BICF2G630715825	0	28521780
1	BICF2G630715837	0	28549864
1	BICF2P123921	0	28562764
1	BICF2G630715854	0	28567926
1	BICF2P1338083	0	28578927
1	BICF2G630715868	0	28588146
1	BICF2S2446595	0	28611244
1	BICF2S2352512	0	28631967
1	BICF2G630715887	0	28651055
1	BICF2S22918394	0	28657743
1	BICF2S23130351	0	28667043
1	BICF2P61782	0	28679956
1	BICF2G630715903	0	28698977
1	BICF2P673410	0	28701627
1	BICF2G630715923	0	28713303
1	BICF2P1527	0	28728244
1	BICF2P338005	0	28740349
1	BICF2S2333824	0	28749448
1	chr1_28762142	0	28762142
1	BICF2P276756	0	28762329
1	BICF2P818519	0	28781232
1	BICF2S23026469	0	28784627
1	BICF2P414126	0	28802611
1	BICF2P663115	0	28805102
1	BICF2P1189089	0	28819855
1	chr1_28831465	0	28831465
1	chr1_28834117	0	28834117
1	BICF2P1344197	0	28848094
1	BICF2G630715936	0	28888166
1	BICF2G630715998	0	28921791
1	chr1_28931378	0	28931378
1	chr1_28933346	0	28933346
1	chr1_28934038	0	28934038
1	BICF2G630716017	0	28938811
1	BICF2P1314354	0	28945936
1	chr1_28950438	0	28950438
1	BICF2G630716024	0	28965026
1	BICF2P118828	0	28977145
1	BICF2G630716025	0	28984745
1	BICF2G630716027	0	29001357
1	BICF2G630716035	0	29013487
1	BICF2G630716067	0	29047031
1	BICF2G630716097	0	29071540
1	BICF2P921656	0	29077740
1	BICF2G630716116	0	29091710
1	BICF2P312690	0	29107249
1	BICF2G630716123	0	29124625
1	BICF2G630716130	0	29149458
1	BICF2G630716134	0	29173380
1	BICF2G630716139	0	29214369
1	BICF2S23039736	0	29219791
1	BICF2P608897	0	29239759
1	BICF2S23256780	0	29250013
1	BICF2S23422673	0	29260841
1	BICF2S23338342	0	29273189
1	BICF2G630716143	0	29284749
1	BICF2G630716149	0	29292151
1	BICF2G630716163	0	29298848
1	BICF2P1166016	0	29311205
1	BICF2G630716177	0	29332833
1	BICF2S22940822	0	29341142
1	chr1_29381440	0	29381440
1	chr1_29397495	0	29397495
1	chr1_29419262	0	29419262
1	chr1_29419724	0	29419724
1	BICF2P788535	0	29429098
1	BICF2G630716183	0	29436104
1	BICF2G630716186	0	29448880
1	BICF2G630716201	0	29457365
1	BICF2G630716203	0	29486729
1	BICF2S2352461	0	29495565
1	chr1_29506943	0	29506943
1	chr1_29507030	0	29507030
1	BICF2S23635164	0	29518645
1	BICF2S2444101	0	29523677
1	BICF2G630716222	0	29548741
1	BICF2G630716228	0	29562084
1	BICF2S23634478	0	29603869
1	chr1_29611762	0	29611762
1	chr1_29625297	0	29625297
1	chr1_29625723	0	29625723
1	chr1_29647956	0	29647956
1	BICF2P204560	0	29654865
[truncated: 173,123 more rows]
